# Supplementary material
Source: MDPI journal article supplement (https://www.mdpi.com/2076-0760/11/11/528)
Supplement: s1 [file s1]

# *Supplementary Material for ‘Validation of the factor structure and gender-related measurement invariance of the Inventory of Socially Supportive Behaviors (short-form): proposing an alternative design’*

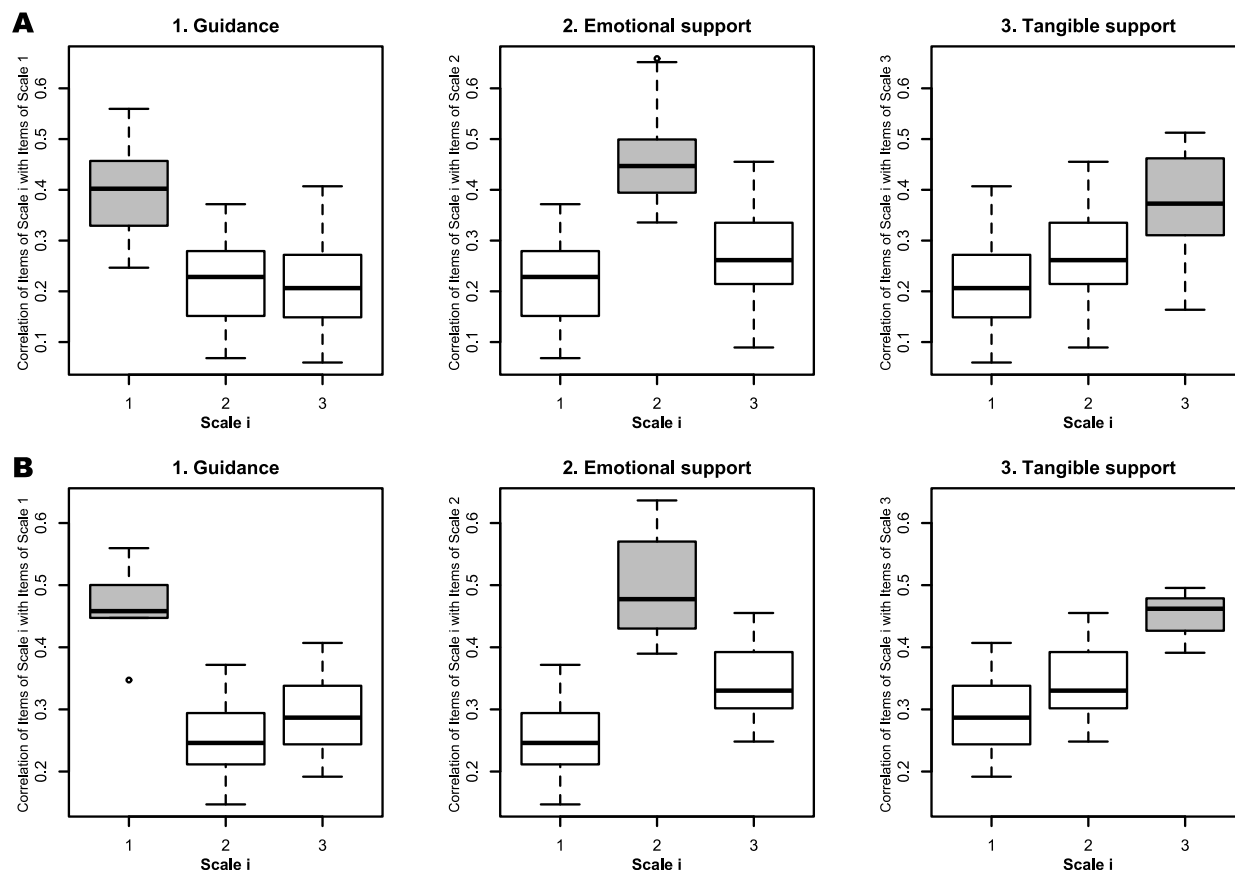

**Supplementary Figure S1.** Multi-trait multimethod assessment of convergent and divergent validity. Barplots show the distribution of correlations of individual ISSB-SF items with other intra- and inter-factor items for (A) the original 19-item and (B) the alternative trimmed version of the instrument.

**Supplementary Table S1.** Standardized loadings of items in individual factors and inter-factors correlations

|                            |         | <b>A. Original model</b>       |          | <b>B. Alternative model</b>    |          |
|----------------------------|---------|--------------------------------|----------|--------------------------------|----------|
|                            |         | <b>Std. <math>\beta</math></b> | <b>P</b> | <b>Std. <math>\beta</math></b> | <b>P</b> |
| <b>Guidance</b>            |         |                                |          |                                |          |
|                            | item1   | 0.673                          | <0.001   | 0.696                          | <0.001   |
|                            | item2   | 0.79                           | <0.001   | 0.807                          | <0.001   |
|                            | item3   | 0.649                          | <0.001   | 0.623                          | <0.001   |
|                            | item4   | 0.584                          | <0.001   |                                |          |
|                            | item5   | 0.398                          | <0.001   |                                |          |
|                            | item6   | 0.6                            | <0.001   | 0.552                          | <0.001   |
| <b>Emotional support</b>   |         |                                |          |                                |          |
|                            | item7   | 0.717                          | <0.001   |                                |          |
|                            | item8   | 0.767                          | <0.001   | 0.753                          | <0.001   |
|                            | item9   | 0.785                          | <0.001   | 0.766                          | <0.001   |
|                            | item10  | 0.731                          | <0.001   | 0.729                          | <0.001   |
|                            | item11  | 0.602                          | <0.001   |                                |          |
|                            | item12  | 0.627                          | <0.001   | 0.615                          | <0.001   |
|                            | item13  | 0.604                          | <0.001   | 0.588                          | <0.001   |
|                            | item14  | 0.596                          | <0.001   |                                |          |
| <b>Tangible support</b>    |         |                                |          |                                |          |
|                            | item15  | 0.36                           | <0.001   |                                |          |
|                            | item16  | 0.515                          | <0.001   |                                |          |
|                            | item17  | 0.63                           | <0.001   | 0.616                          | <0.001   |
|                            | item18  | 0.733                          | <0.001   | 0.754                          | <0.001   |
|                            | item19  | 0.664                          | <0.001   | 0.645                          | <0.001   |
| <b>Factor correlations</b> |         |                                |          |                                |          |
|                            | GDN~EMS | 0.504                          | <0.001   | 0.51                           | <0.001   |
|                            | GDN~TNS | 0.625                          | <0.001   | 0.632                          | <0.001   |
|                            | EMS~TNS | 0.689                          | <0.001   | 0.728                          | <0.001   |

Abbrev.: GDN – Guidance, EMS – Emotional support, TNS – Tangible support

**Supplementary Table S2.** Discriminant validity estimates and likelihood ratio test against constrained model

| corr. est. [95%CI]   |                      | AIC         | BIC         | X2          | X <sup>2</sup> diff. | P      |
|----------------------|----------------------|-------------|-------------|-------------|----------------------|--------|
| A. Original model    |                      |             |             |             |                      |        |
| GDN~EMS              | 0.504 [0.435, 0.573] | 35886.30419 | 36082.61058 | 895.8868351 | 300.3405429          | <0.001 |
| GDN~TNS              | 0.625 [0.557, 0.692] | 35693.65744 | 35889.96384 | 703.240093  | 107.6938008          | <0.001 |
| EMS~TNS              | 0.689 [0.630, 0.747] | 35668.40696 | 35864.71335 | 677.9896069 | 82.44331467          | <0.001 |
| B. Alternative model |                      |             |             |             |                      |        |
| GDN~EMS              | 0.510 [0.437, 0.584] | 22582.21726 | 22714.60994 | 388.3950472 | 200.922361           | <0.001 |
| GDN~TNS              | 0.632 [0.561, 0.703] | 22463.81157 | 22596.20426 | 269.9893618 | 82.51667556          | <0.001 |
| EMS~TNS              | 0.728 [0.667, 0.789] | 22421.97437 | 22554.36706 | 228.1521639 | 40.67947764          | <0.001 |

Abbrev.: GDN – Guidance, EMS – Emotional support, TNS – Tangible support
